# Supplementary material for: Genomic landscape and evolutionary dynamics of mariner transposable elements within the Drosophila genus
Source: PubMed Central journal article supplement (PMC4161770; doi:10.1186/1471-2164-15-727), 2014-08-27

**Figure S2 . Violin pots depicting the distribution of copies relative to genes for *Dromar5* and *Dromar11* in *D. Eugracilis*. Significant differences (Kolmogorov-Smirnov test) are indicated. M: MITE lineage, FL: full-length lineage. n: copy number (percentage of copies located on genes-containing contigs)**

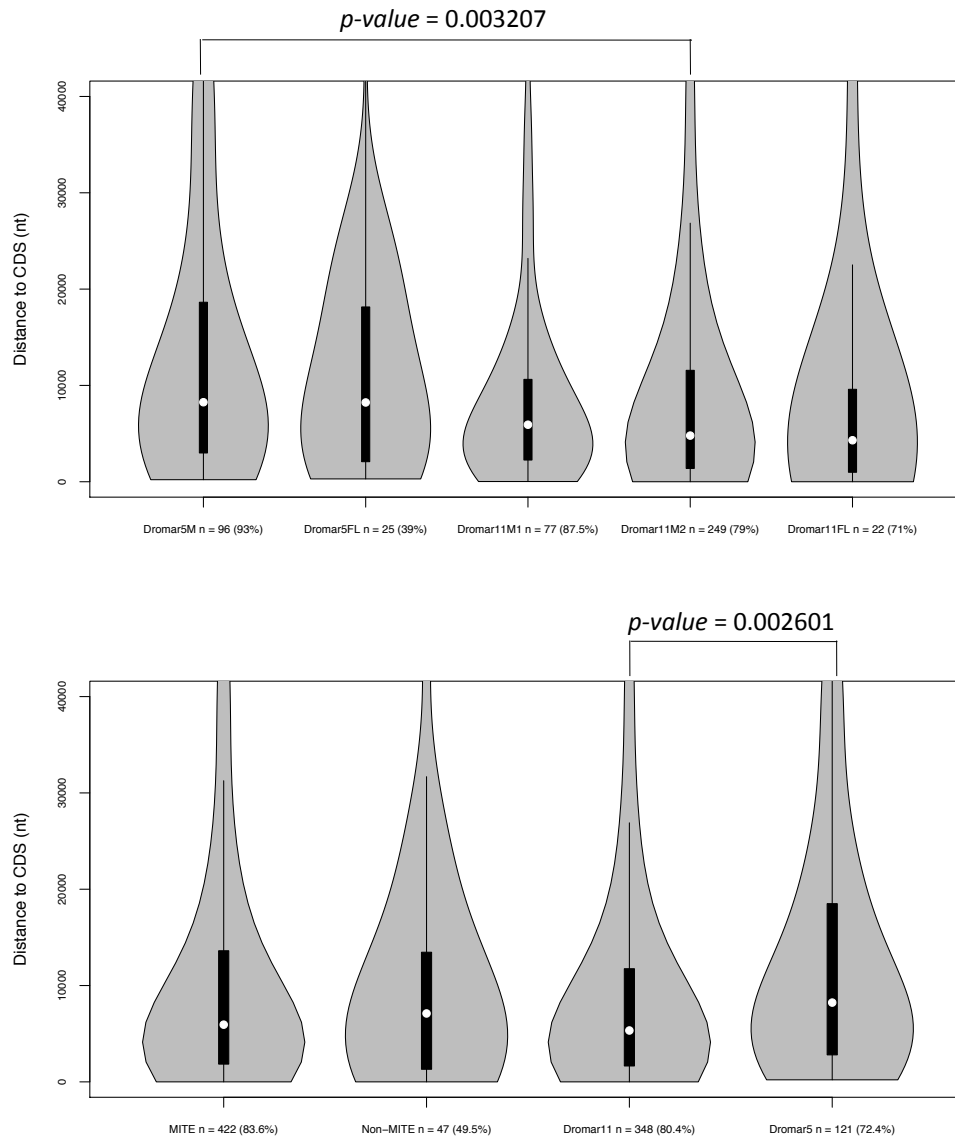

Supplement: 12864_2014_6424_MOESM5_ESM.pdf [file 12864_2014_6424_MOESM5_ESM.pdf]
