# Supplementary material for: Genomic landscape and evolutionary dynamics of mariner transposable elements within the Drosophila genus
Source: PubMed Central journal article supplement (PMC4161770; doi:10.1186/1471-2164-15-727), 2014-08-27

**Figure S3. Analysis of the trinucleotide preference in 5' (A) and 3' (B) of the insertion TA site for the *mellifera* and *drosophila* subfamilies. Only trinucleotides found more than 5 times in the data are presented**

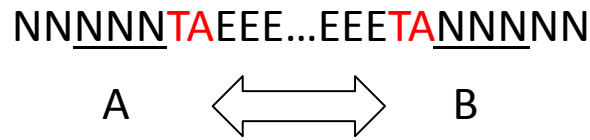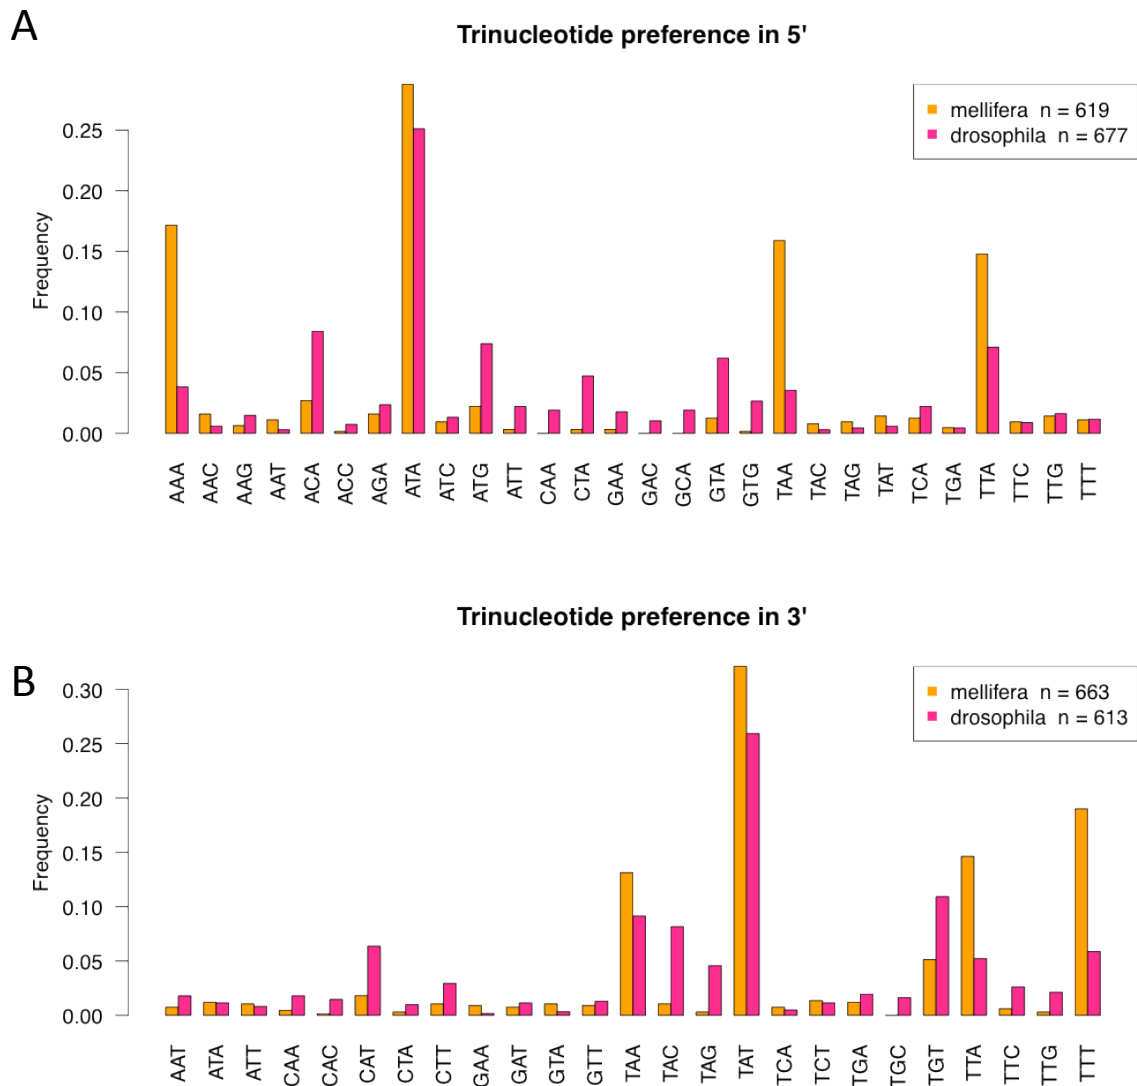

Supplement: 12864_2014_6424_MOESM7_ESM.pdf [file 12864_2014_6424_MOESM7_ESM.pdf]
